# Supplementary material for: Digital hermeneutics: scaled readings of online depression discourses
Source: HighWire-hosted journal article supplement (doi:10.1136/medhum-2020-012104), 2021-10-14
Supplement: medhum-2020-012104supp001_data_supplement.pdf [file medhum-2020-012104supp001_data_supplement.pdf]

**Appendix 1. Writing sample for close reading scale**

I feel as if I am not wanted around. I feel like a burdon. I feel like a failure. I feel alone. I feel sad. I feel like I'm not good enough. I feel like I annoy anyone I talk to. I feel like the only people who like me are children. I feel unipriciated. I feel like shit. I feel like people hate everything about me. I feel like I am unattrative. I feel like cutting again. I feel like it helps me be a happier and better person. I feel that I feel too much. I feel that if I show my feelings people wont except me. I feel that if I show my true feelings to people will think I'm crazy. I feel that I am to fat. I feel that no one likes me as a person. I feel that people put on a face towards me. I feel like Isolating myself. I feel that no one wants me here. I feel like running away. I feel like it would be better if I wasn't here. I feel like throwing up. I feel like never eating again. I feel like eating everything in the world. I feel like no one has ever truly liked me and never will. I feel like crying. I feel like cutting again tonight. I feel like it will solve my problems. I feel like it will make me better. I want to be numb. \n I'm sorry I just found your post, but If you need somebody to talk to I'll be here for you <3
